# Supplementary material for: Evidence That Parietal Lobe Fatty Acids May Be More Profoundly Affected in Moderate Alzheimer’s Disease (AD) Pathology Than in Severe AD Pathology
Source: PubMed Central journal article supplement (PMC6316131; doi:10.3390/metabo8040069), 2018-10-26
Supplement: metabolites-08-00069-s001.pdf [file metabolites-08-00069-s001.pdf]

**Table S1.** Descriptive characteristics of the study population by group.

|                                       | <b>Control<br/>(n=27)</b> | <b>Moderate AD (n=16)</b> | <b>Severe AD<br/>(n=30)</b> | <b>DLB<br/>(n=14)</b> |
|---------------------------------------|---------------------------|---------------------------|-----------------------------|-----------------------|
| <b>Age (years) ‡</b>                  | 80.7 (8.3)                | 85.6 (8.4)                | 82.5 (6.2)                  | 78.8 (7.7)            |
| <b>Female/male, n‡</b>                | 13/13                     | 8/7                       | 15/15                       | 5/9                   |
| <b>Postmortem delay (hours) ‡</b>     | 39.6 (18.4)               | 30.7 (17.9)*              | 48.4 (23.4)*                | 36.9 (19.6)           |
| <b>Braak Stage, n (0/1/2/3/4/5/6)</b> | (7/6/14/0/0/0/0)          | (0/0/0/5/11/0/0)          | (0/0/0/0/0/12/18)           | (4/0/6/3/0/0/1)       |

‡Results are presented as mean (±SD). Group comparisons of patient characteristics (age, % female and post-mortem delay) were compared by parametric one-way ANOVA. There were no significant differences between groups for age or gender. \*Post-mortem delay was significantly longer in cases of severe AD compared with cases of moderate AD ( $p = 0.03$ ).

**Table S2.** Aggregated fatty acid concentrations and ratios.

|                                     | <b>Control</b> | <b>Moderate AD</b> | <b>Severe AD</b> | <b>DLB</b>    | <b>P-value</b> |
|-------------------------------------|----------------|--------------------|------------------|---------------|----------------|
| <b>Total FA (g/kg dry weight)</b>   | 114.7 ± 5.414  | 148.4 ± 3.612      | 128.4 ± 5.864    | 149.9 ± 6.807 | <0.001         |
| <b>Total SFA (g/kg dry weight)</b>  | 40.24 ± 1.878  | 51.19 ± 1.119      | 45.72 ± 2.052    | 50.99 ± 2.317 | <0.001         |
| <b>Total MUFA (g/kg dry weight)</b> | 32.32 ± 1.569  | 43.52 ± 1.724      | 36.81 ± 1.997    | 42.87 ± 1.860 | <0.001         |
| <b>Total PUFA (g/kg dry weight)</b> | 42.04 ± 2.222  | 53.63 ± 1.291      | 45.82 ± 2.446    | 56.02 ± 3.205 | <0.001         |
| <b>Omega 3/Omega 6</b>              | 2.454 ± 0.654  | 2.421 ± 0.510      | 2.730 ± 1.573    | 2.465 ± 0.567 | 0.700          |
| <b>16:1/16:0</b>                    | 1.126 ± 0.405  | 1.146 ± 0.469      | 1.082 ± 0.118    | 1.121 ± 0.393 | 0.933          |

Results are presented as mean (±SD). Aggregated fatty acid concentrations and ratios were derived from individual concentrations (Table 1). P-values were generated from the Kruskal Wallis (KW) test with a P-value of less than 0.05 deemed to be statistically significant.

**Table S3.** Associations between fatty acids and clinical variables (age, gender, post-mortem delay, frontal tissue pH, beta-amyloid, tau).

| Fatty acid                           | Gender         | Age        |         | Post-mortem delay |                |            | Frontal tissue pH |            | Beta-amyloid |                | Tau            |  |
|--------------------------------------|----------------|------------|---------|-------------------|----------------|------------|-------------------|------------|--------------|----------------|----------------|--|
|                                      | P-value        | Spearman r | P-value | Spearman r        | P-value        | Spearman r | P-value           | Spearman r | P-value      | Spearman r     | P-value        |  |
| Docosahexanoic Acid                  | 0.9930         | -0.04181   | 0.6972  | -0.0623           | 0.5642         | 0.0276     | 0.887             | 0.2803     | 0.1951       | -0.424         | 0.0964         |  |
| Nervonic Acid                        | 0.5844         | -0.1096    | 0.3067  | -0.2028           | 0.0581         | -0.02292   | 0.9061            | -0.105     | 0.6335       | -0.201         | 0.4481         |  |
| Lignoceric Acid                      | 0.5841         | -0.1563    | 0.1436  | <b>-0.315</b>     | <b>0.0028*</b> | -0.07566   | 0.6965            | 0.1778     | 0.417        | -0.4044        | 0.1063         |  |
| <i>Cis</i> -13,16-Docosadienoic      | 0.6424         | 0.05779    | 0.5907  | -0.1615           | 0.1328         | 0.09612    | 0.6199            | 0.3749     | 0.0779       | -0.2426        | 0.3357         |  |
| Arachidonic acid                     | 0.7821         | -0.1011    | 0.3459  | <b>-0.2501</b>    | <b>0.0188*</b> | -0.105     | 0.5878            | 0.1426     | 0.5162       | -0.4632        | 0.0312         |  |
| Tricosanoic Acid                     | 0.2755         | -0.1938    | 0.0688  | -0.1501           | 0.1627         | 0.2783     | 0.1439            | 0.1788     | 0.4143       | -0.1471        | 0.5616         |  |
| <i>Cis</i> -11,14,17-Eicosatrienoic  | 0.3278         | -0.01734   | 0.8719  | <b>-0.2704</b>    | <b>0.0108*</b> | -0.1698    | 0.3785            | 0.03863    | 0.8611       | <b>-0.7304</b> | <b>0.0013*</b> |  |
| Erucic acid                          | 0.2273         | 0.03136    | 0.7705  | -0.2062           | 0.054          | -0.1935    | 0.3146            | 0.1783     | 0.4156       | <b>-0.5735</b> | <b>0.0175*</b> |  |
| <i>Cis</i> -8,11,14-eicosatreinoic   | 0.7939         | 0.02736    | 0.7991  | 0.04522           | 0.6757         | 0.0971     | 0.6163            | 0.3982     | 0.0598       | 0.152          | 0.5601         |  |
| Behenic acid                         | 0.8535         | -0.105     | 0.3276  | -0.3132           | 0.003          | -0.09119   | 0.638             | 0.1471     | 0.503        | -0.4142        | 0.0995         |  |
| <i>Cis</i> -11,14-eicosadienoic acid | 0.6927         | 0.02597    | 0.8091  | -0.03961          | 0.7141         | -0.105     | 0.5878            | 0.207      | 0.3432       | -0.3529        | 0.1621         |  |
| Heneicosanoic acid                   | 0.2348         | -0.02369   | 0.8256  | -0.1736           | 0.1058         | -0.0732    | 0.7059            | 0.07875    | 0.721        | -0.1569        | 0.5459         |  |
| Linolenic acid                       | 0.3510         | 0.03517    | 0.7435  | <b>-0.2148</b>    | <b>0.0445*</b> | -0.1538    | 0.4257            | 0.1218     | 0.5797       | -0.6642        | 0.0051         |  |
| <i>Cis</i> -11-eicosanoic acid       | 0.7543         | 0.06844    | 0.5239  | 0.03979           | 0.7128         | -0.1481    | 0.4432            | 0.2888     | 0.1815       | -0.3676        | 0.1121         |  |
| Arachidic acid                       | 0.5125         | -0.00498   | 0.9631  | <b>-0.2716</b>    | <b>0.0105*</b> | -0.07936   | 0.6824            | 0.1664     | 0.4479       | -0.4167        | 0.0998         |  |
| Linoleic acid                        | <b>0.0469*</b> | -0.01845   | 0.8638  | -0.09548          | 0.3762         | -0.3571    | 0.0572            | 0.1426     | 0.5162       | -0.09804       | 0.6642         |  |
| Linolelaidic acid                    | 0.3363         | 0.06029    | 0.5747  | 0.06752           | 0.5319         | -0.1866    | 0.3325            | -0.06686   | 0.7618       | <b>-0.5</b>    | <b>0.040*</b>  |  |
| Oleic acid                           | 0.5585         | -0.05324   | 0.6202  | -0.2015           | 0.0598         | -0.1824    | 0.3437            | 0.1456     | 0.5074       | -0.2451        | 0.3213         |  |
| Stearic acid                         | 0.7881         | -0.0168    | 0.8758  | <b>-0.2421</b>    | <b>0.023*</b>  | -0.05767   | 0.7663            | 0.2793     | 0.1967       | -0.2647        | 0.3003         |  |
| <i>Cis</i> -10-heptadecanoic acid    | 0.7840         | 0.09948    | 0.3537  | -0.2131           | 0.0463         | -0.08404   | 0.6647            | 0.3522     | 0.0994       | -0.1544        | 0.561          |  |
| Heptadecanoic acid                   | 0.9101         | -0.09664   | 0.3676  | -0.1261           | 0.2416         | -0.1294    | 0.5035            | 0.1506     | 0.4929       | -0.3505        | 0.1118         |  |
| Palmitoleic acid                     | 0.1840         | -0.05153   | 0.6315  | -0.03188          | 0.7681         | -0.05915   | 0.7605            | 0.2932     | 0.1745       | -0.201         | 0.4214         |  |
| Palmitic acid                        | 0.4333         | -0.005368  | 0.9602  | -0.09706          | 0.3683         | 0.04091    | 0.8331            | 0.4131     | 0.0510       | -0.1299        | 0.6041         |  |
| Pentadecanoic acid                   | 0.0754         | -0.07179   | 0.5038  | 0.04819           | 0.6557         | -0.1866    | 0.3325            | 0.1501     | 0.4943       | -0.451         | 0.085          |  |

P-values for gender were obtained by dividing all cases into either male or female and conducting a Mann-Whitney U test. All other results were obtained by conducting Spearman r correlation analysis on the stated continuous variables. Statistically significant results are indicated with an asterisk.

Figure S1. Principal Component Analysis (PCA) of fatty acid concentrations in post-mortem human brain specimens.

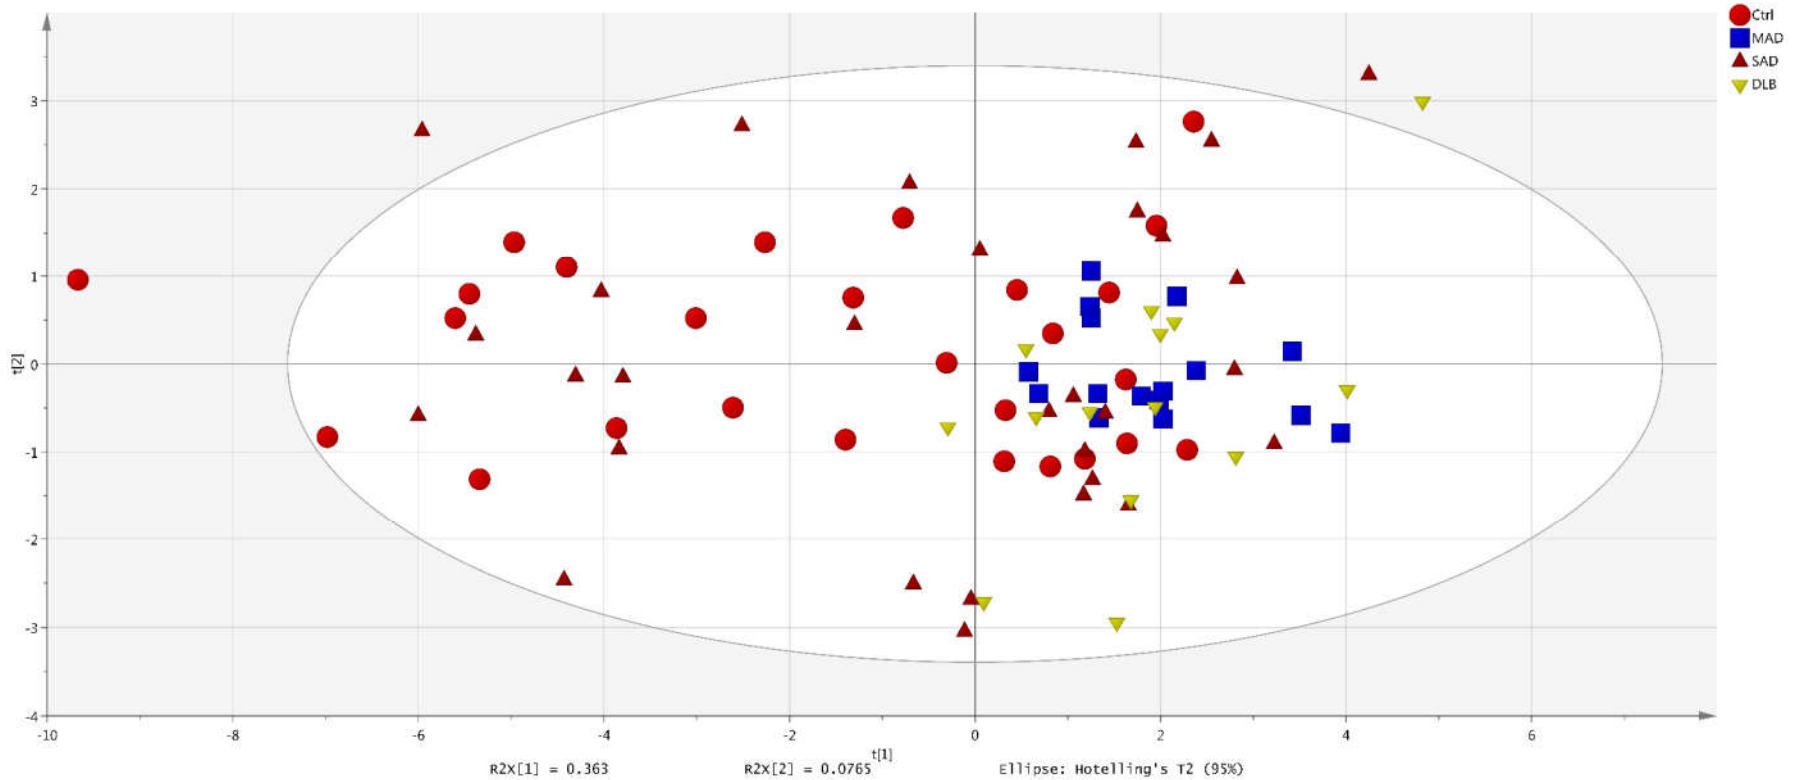

PCA was completed using Simca P (v14.1; Umetrics, Umea, Sweden) based on mean centered and log transformed prior to analysis. The scores plot above was generated by principal component analysis (PCA). The first two components accounted for approximately 43% of the total variance; whereas the first component (PC1) explained 36.3% of the variation, the second component (PC2) explained 7.7%. Furthermore, PC3 showed no distinct group separation pattern. Red circles = Control; Blue Squares = Moderate AD; Red triangles = Severe AD; Yellow triangles = Dementia with Lewy Bodies.
